# Supplementary material
Source: Research Square preprint supplement (doi:10.21203/rs.3.rs-9140376/v1)
Supplement: Supplementary file 1 [file a50b5afb1dae6b884ef56e0f.pdf]

Supplementary Material on Complement inhibitor therapy in atypical hemolytic uremic syndrome (aHUS): Evaluating the economic impact of introducing eculizumab biosimilars in Germany by Kaufhold et al.

Table S1: Weekly treatment costs

| Weeks | Eculizumab biosimilar | Eculizumab originator | Ravulizumab |
|-------|-----------------------|-----------------------|-------------|
| 1     | 11.729 €              | 16.184 €              | 36.902 €    |
| 2     | 23.458 €              | 32.369 €              | 36.902 €    |
| 3     | 35.187 €              | 48.553 €              | 81.982 €    |
| 4     | 46.915 €              | 64.737 €              | 81.982 €    |
| 5     | 62.521 €              | 86.283 €              | 81.982 €    |
| 6     | 62.521 €              | 86.283 €              | 81.982 €    |
| 7     | 78.126 €              | 107.829 €             | 81.982 €    |
| 8     | 78.126 €              | 107.829 €             | 81.982 €    |
| 9     | 93.731 €              | 129.375 €             | 81.982 €    |
| 10    | 93.731 €              | 129.375 €             | 81.982 €    |
| 11    | 109.336 €             | 150.920 €             | 127.062 €   |
| 12    | 109.336 €             | 150.920 €             | 127.062 €   |
| 13    | 124.941 €             | 172.466 €             | 127.062 €   |
| 14    | 124.941 €             | 172.466 €             | 127.062 €   |
| 15    | 140.546 €             | 194.012 €             | 127.062 €   |
| 16    | 140.546 €             | 194.012 €             | 127.062 €   |
| 17    | 156.151 €             | 215.558 €             | 127.062 €   |
| 18    | 156.151 €             | 215.558 €             | 127.062 €   |
| 19    | 171.757 €             | 237.103 €             | 172.142 €   |
| 20    | 171.757 €             | 237.103 €             | 172.142 €   |
| 21    | 187.362 €             | 258.649 €             | 172.142 €   |
| 22    | 187.362 €             | 258.649 €             | 172.142 €   |
| 23    | 202.967 €             | 280.195 €             | 172.142 €   |
| 24    | 202.967 €             | 280.195 €             | 172.142 €   |
| 25    | 218.572 €             | 301.741 €             | 172.142 €   |
| 26    | 218.572 €             | 301.741 €             | 172.142 €   |
| 27    | 234.177 €             | 323.286 €             | 217.223 €   |
| 28    | 234.177 €             | 323.286 €             | 217.223 €   |
| 29    | 249.782 €             | 344.832 €             | 217.223 €   |
| 30    | 249.782 €             | 344.832 €             | 217.223 €   |
| 31    | 265.387 €             | 366.378 €             | 217.223 €   |
| 32    | 265.387 €             | 366.378 €             | 217.223 €   |
| 33    | 280.993 €             | 387.924 €             | 217.223 €   |
| 34    | 280.993 €             | 387.924 €             | 217.223 €   |
| 35    | 296.598 €             | 409.469 €             | 262.303 €   |
| 36    | 296.598 €             | 409.469 €             | 262.303 €   |
| 37    | 312.203 €             | 431.015 €             | 262.303 €   |
| 38    | 312.203 €             | 431.015 €             | 262.303 €   |
| 39    | 327.808 €             | 452.561 €             | 262.303 €   |
| 40    | 327.808 €             | 452.561 €             | 262.303 €   |

|    |           |           |           |
|----|-----------|-----------|-----------|
| 41 | 343.413 € | 474.107 € | 262.303 € |
| 42 | 343.413 € | 474.107 € | 262.303 € |
| 43 | 359.018 € | 495.652 € | 307.383 € |
| 44 | 359.018 € | 495.652 € | 307.383 € |
| 45 | 374.623 € | 517.198 € | 307.383 € |
| 46 | 374.623 € | 517.198 € | 307.383 € |
| 47 | 390.229 € | 538.744 € | 307.383 € |
| 48 | 390.229 € | 538.744 € | 307.383 € |
| 49 | 405.834 € | 560.290 € | 307.383 € |
| 50 | 405.834 € | 560.290 € | 307.383 € |
| 51 | 421.439 € | 581.836 € | 352.463 € |
| 52 | 421.439 € | 581.836 € | 352.463 € |

Table S2: Sensitivity analysis for Eculizumab biosimilar

| Weeks | Eculizumab biosimilar | - 5%      | - 10%     | - 20%     |
|-------|-----------------------|-----------|-----------|-----------|
| 1     | 11.729 €              | 11.147 €  | 10.566 €  | 9.403 €   |
| 2     | 23.458 €              | 22.295 €  | 21.132 €  | 18.806 €  |
| 3     | 35.187 €              | 33.442 €  | 31.698 €  | 28.209 €  |
| 4     | 46.915 €              | 44.590 €  | 42.264 €  | 37.612 €  |
| 5     | 62.521 €              | 59.420 €  | 56.319 €  | 50.116 €  |
| 6     | 62.521 €              | 59.420 €  | 56.319 €  | 50.116 €  |
| 7     | 78.126 €              | 74.249 €  | 70.373 €  | 62.621 €  |
| 8     | 78.126 €              | 74.249 €  | 70.373 €  | 62.621 €  |
| 9     | 93.731 €              | 89.079 €  | 84.428 €  | 75.125 €  |
| 10    | 93.731 €              | 89.079 €  | 84.428 €  | 75.125 €  |
| 11    | 109.336 €             | 103.909 € | 98.482 €  | 87.629 €  |
| 12    | 109.336 €             | 103.909 € | 98.482 €  | 87.629 €  |
| 13    | 124.941 €             | 118.739 € | 112.537 € | 100.133 € |
| 14    | 124.941 €             | 118.739 € | 112.537 € | 100.133 € |
| 15    | 140.546 €             | 133.569 € | 126.592 € | 112.637 € |
| 16    | 140.546 €             | 133.569 € | 126.592 € | 112.637 € |
| 17    | 156.151 €             | 148.399 € | 140.646 € | 125.141 € |
| 18    | 156.151 €             | 148.399 € | 140.646 € | 125.141 € |
| 19    | 171.757 €             | 163.229 € | 154.701 € | 137.645 € |
| 20    | 171.757 €             | 163.229 € | 154.701 € | 137.645 € |
| 21    | 187.362 €             | 178.059 € | 168.756 € | 150.149 € |
| 22    | 187.362 €             | 178.059 € | 168.756 € | 150.149 € |
| 23    | 202.967 €             | 192.888 € | 182.810 € | 162.653 € |
| 24    | 202.967 €             | 192.888 € | 182.810 € | 162.653 € |
| 25    | 218.572 €             | 207.718 € | 196.865 € | 175.158 € |
| 26    | 218.572 €             | 207.718 € | 196.865 € | 175.158 € |
| 27    | 234.177 €             | 222.548 € | 210.919 € | 187.662 € |
| 28    | 234.177 €             | 222.548 € | 210.919 € | 187.662 € |
| 29    | 249.782 €             | 237.378 € | 224.974 € | 200.166 € |
| 30    | 249.782 €             | 237.378 € | 224.974 € | 200.166 € |

|    |           |           |           |           |
|----|-----------|-----------|-----------|-----------|
| 31 | 265.387 € | 252.208 € | 239.029 € | 212.670 € |
| 32 | 265.387 € | 252.208 € | 239.029 € | 212.670 € |
| 33 | 280.993 € | 267.038 € | 253.083 € | 225.174 € |
| 34 | 280.993 € | 267.038 € | 253.083 € | 225.174 € |
| 35 | 296.598 € | 281.868 € | 267.138 € | 237.678 € |
| 36 | 296.598 € | 281.868 € | 267.138 € | 237.678 € |
| 37 | 312.203 € | 296.698 € | 281.193 € | 250.182 € |
| 38 | 312.203 € | 296.698 € | 281.193 € | 250.182 € |
| 39 | 327.808 € | 311.528 € | 295.247 € | 262.686 € |
| 40 | 327.808 € | 311.528 € | 295.247 € | 262.686 € |
| 41 | 343.413 € | 326.357 € | 309.302 € | 275.190 € |
| 42 | 343.413 € | 326.357 € | 309.302 € | 275.190 € |
| 43 | 359.018 € | 341.187 € | 323.356 € | 287.695 € |
| 44 | 359.018 € | 341.187 € | 323.356 € | 287.695 € |
| 45 | 374.623 € | 356.017 € | 337.411 € | 300.199 € |
| 46 | 374.623 € | 356.017 € | 337.411 € | 300.199 € |
| 47 | 390.229 € | 370.847 € | 351.466 € | 312.703 € |
| 48 | 390.229 € | 370.847 € | 351.466 € | 312.703 € |
| 49 | 405.834 € | 385.677 € | 365.520 € | 325.207 € |
| 50 | 405.834 € | 385.677 € | 365.520 € | 325.207 € |
| 51 | 421.439 € | 400.507 € | 379.575 € | 337.711 € |
| 52 | 421.439 € | 400.507 € | 379.575 € | 337.711 € |

Table S3: Sensitivity analysis results for Eculizumab originator

| Weeks | Eculizumab originator | - 5%      | - 10%     | - 20%     |
|-------|-----------------------|-----------|-----------|-----------|
| 1     | 16.184 €              | 15.380 €  | 14.576 €  | 12.967 €  |
| 2     | 32.369 €              | 30.760 €  | 29.152 €  | 25.935 €  |
| 3     | 48.553 €              | 46.140 €  | 43.728 €  | 38.902 €  |
| 4     | 64.737 €              | 61.520 €  | 58.304 €  | 51.870 €  |
| 5     | 86.283 €              | 81.994 €  | 77.705 €  | 69.126 €  |
| 6     | 86.283 €              | 81.994 €  | 77.705 €  | 69.126 €  |
| 7     | 107.829 €             | 102.467 € | 97.106 €  | 86.383 €  |
| 8     | 107.829 €             | 102.467 € | 97.106 €  | 86.383 €  |
| 9     | 129.375 €             | 122.941 € | 116.507 € | 103.640 € |
| 10    | 129.375 €             | 122.941 € | 116.507 € | 103.640 € |
| 11    | 150.920 €             | 143.414 € | 135.908 € | 120.896 € |
| 12    | 150.920 €             | 143.414 € | 135.908 € | 120.896 € |
| 13    | 172.466 €             | 163.888 € | 155.309 € | 138.153 € |
| 14    | 172.466 €             | 163.888 € | 155.309 € | 138.153 € |
| 15    | 194.012 €             | 184.361 € | 174.711 € | 155.409 € |
| 16    | 194.012 €             | 184.361 € | 174.711 € | 155.409 € |
| 17    | 215.558 €             | 204.835 € | 194.112 € | 172.666 € |
| 18    | 215.558 €             | 204.835 € | 194.112 € | 172.666 € |
| 19    | 237.103 €             | 225.308 € | 213.513 € | 189.923 € |
| 20    | 237.103 €             | 225.308 € | 213.513 € | 189.923 € |

|    |           |           |           |           |
|----|-----------|-----------|-----------|-----------|
| 21 | 258.649 € | 245.782 € | 232.914 € | 207.179 € |
| 22 | 258.649 € | 245.782 € | 232.914 € | 207.179 € |
| 23 | 280.195 € | 266.255 € | 252.315 € | 224.436 € |
| 24 | 280.195 € | 266.255 € | 252.315 € | 224.436 € |
| 25 | 301.741 € | 286.729 € | 271.717 € | 241.693 € |
| 26 | 301.741 € | 286.729 € | 271.717 € | 241.693 € |
| 27 | 323.286 € | 307.202 € | 291.118 € | 258.949 € |
| 28 | 323.286 € | 307.202 € | 291.118 € | 258.949 € |
| 29 | 344.832 € | 327.676 € | 310.519 € | 276.206 € |
| 30 | 344.832 € | 327.676 € | 310.519 € | 276.206 € |
| 31 | 366.378 € | 348.149 € | 329.920 € | 293.462 € |
| 32 | 366.378 € | 348.149 € | 329.920 € | 293.462 € |
| 33 | 387.924 € | 368.622 € | 349.321 € | 310.719 € |
| 34 | 387.924 € | 368.622 € | 349.321 € | 310.719 € |
| 35 | 409.469 € | 389.096 € | 368.722 € | 327.976 € |
| 36 | 409.469 € | 389.096 € | 368.722 € | 327.976 € |
| 37 | 431.015 € | 409.569 € | 388.124 € | 345.232 € |
| 38 | 431.015 € | 409.569 € | 388.124 € | 345.232 € |
| 39 | 452.561 € | 430.043 € | 407.525 € | 362.489 € |
| 40 | 452.561 € | 430.043 € | 407.525 € | 362.489 € |
| 41 | 474.107 € | 450.516 € | 426.926 € | 379.745 € |
| 42 | 474.107 € | 450.516 € | 426.926 € | 379.745 € |
| 43 | 495.652 € | 470.990 € | 446.327 € | 397.002 € |
| 44 | 495.652 € | 470.990 € | 446.327 € | 397.002 € |
| 45 | 517.198 € | 491.463 € | 465.728 € | 414.259 € |
| 46 | 517.198 € | 491.463 € | 465.728 € | 414.259 € |
| 47 | 538.744 € | 511.937 € | 485.130 € | 431.515 € |
| 48 | 538.744 € | 511.937 € | 485.130 € | 431.515 € |
| 49 | 560.290 € | 532.410 € | 504.531 € | 448.772 € |
| 50 | 560.290 € | 532.410 € | 504.531 € | 448.772 € |
| 51 | 581.836 € | 552.884 € | 523.932 € | 466.028 € |
| 52 | 581.836 € | 552.884 € | 523.932 € | 466.028 € |

Table S4: Sensitivity analysis results for Ravulizumab

| Weeks | Ravulizumab | - 5%      | - 10%     | - 20%     |
|-------|-------------|-----------|-----------|-----------|
| 1     | 36.902 €    | 35.062 €  | 33.222 €  | 29.542 €  |
| 2     | 36.902 €    | 35.062 €  | 33.222 €  | 29.542 €  |
| 3     | 81.982 €    | 77.893 €  | 73.804 €  | 65.626 €  |
| 4     | 81.982 €    | 77.893 €  | 73.804 €  | 65.626 €  |
| 5     | 81.982 €    | 77.893 €  | 73.804 €  | 65.626 €  |
| 6     | 81.982 €    | 77.893 €  | 73.804 €  | 65.626 €  |
| 7     | 81.982 €    | 77.893 €  | 73.804 €  | 65.626 €  |
| 8     | 81.982 €    | 77.893 €  | 73.804 €  | 65.626 €  |
| 9     | 81.982 €    | 77.893 €  | 73.804 €  | 65.626 €  |
| 10    | 81.982 €    | 77.893 €  | 73.804 €  | 65.626 €  |
| 11    | 127.062 €   | 120.724 € | 114.386 € | 101.710 € |

|    |           |           |           |           |
|----|-----------|-----------|-----------|-----------|
| 12 | 127.062 € | 120.724 € | 114.386 € | 101.710 € |
| 13 | 127.062 € | 120.724 € | 114.386 € | 101.710 € |
| 14 | 127.062 € | 120.724 € | 114.386 € | 101.710 € |
| 15 | 127.062 € | 120.724 € | 114.386 € | 101.710 € |
| 16 | 127.062 € | 120.724 € | 114.386 € | 101.710 € |
| 17 | 127.062 € | 120.724 € | 114.386 € | 101.710 € |
| 18 | 127.062 € | 120.724 € | 114.386 € | 101.710 € |
| 19 | 172.142 € | 163.555 € | 154.968 € | 137.794 € |
| 20 | 172.142 € | 163.555 € | 154.968 € | 137.794 € |
| 21 | 172.142 € | 163.555 € | 154.968 € | 137.794 € |
| 22 | 172.142 € | 163.555 € | 154.968 € | 137.794 € |
| 23 | 172.142 € | 163.555 € | 154.968 € | 137.794 € |
| 24 | 172.142 € | 163.555 € | 154.968 € | 137.794 € |
| 25 | 172.142 € | 163.555 € | 154.968 € | 137.794 € |
| 26 | 172.142 € | 163.555 € | 154.968 € | 137.794 € |
| 27 | 217.223 € | 206.386 € | 195.550 € | 173.878 € |
| 28 | 217.223 € | 206.386 € | 195.550 € | 173.878 € |
| 29 | 217.223 € | 206.386 € | 195.550 € | 173.878 € |
| 30 | 217.223 € | 206.386 € | 195.550 € | 173.878 € |
| 31 | 217.223 € | 206.386 € | 195.550 € | 173.878 € |
| 32 | 217.223 € | 206.386 € | 195.550 € | 173.878 € |
| 33 | 217.223 € | 206.386 € | 195.550 € | 173.878 € |
| 34 | 217.223 € | 206.386 € | 195.550 € | 173.878 € |
| 35 | 262.303 € | 249.218 € | 236.132 € | 209.962 € |
| 36 | 262.303 € | 249.218 € | 236.132 € | 209.962 € |
| 37 | 262.303 € | 249.218 € | 236.132 € | 209.962 € |
| 38 | 262.303 € | 249.218 € | 236.132 € | 209.962 € |
| 39 | 262.303 € | 249.218 € | 236.132 € | 209.962 € |
| 40 | 262.303 € | 249.218 € | 236.132 € | 209.962 € |
| 41 | 262.303 € | 249.218 € | 236.132 € | 209.962 € |
| 42 | 262.303 € | 249.218 € | 236.132 € | 209.962 € |
| 43 | 307.383 € | 292.049 € | 276.715 € | 246.046 € |
| 44 | 307.383 € | 292.049 € | 276.715 € | 246.046 € |
| 45 | 307.383 € | 292.049 € | 276.715 € | 246.046 € |
| 46 | 307.383 € | 292.049 € | 276.715 € | 246.046 € |
| 47 | 307.383 € | 292.049 € | 276.715 € | 246.046 € |
| 48 | 307.383 € | 292.049 € | 276.715 € | 246.046 € |
| 49 | 307.383 € | 292.049 € | 276.715 € | 246.046 € |
| 50 | 307.383 € | 292.049 € | 276.715 € | 246.046 € |
| 51 | 352.463 € | 334.880 € | 317.297 € | 282.130 € |
| 52 | 352.463 € | 334.880 € | 317.297 € | 282.130 € |
